# Supplementary material for: CpG-mediated TLR9 signalling enhances the efficacy of the OprF/PcrV DNA vaccine with cGAS-STING-activating properties
Source: Research Square preprint supplement (doi:10.21203/rs.3.rs-5653824/v1), 2024-12-19
Supplement: Supplementary file 1 [file 1ae1ce5248382c1c367aafc6.docx]

**Table S1**

| **Genes** | **Primer sequences (listed in 5’ to 3’ orientation)** |
| --- | --- |
| β-Actin | F’: GTGACGTTGACATCCGTAAAGA  R’: GCCGGACTCATCGTACTCC |
| TLR9 | F’: ACAACTCTGACTTCGTCCACC  R’: TCTGGGCTCAATGGTCATGTG |
| STING | F’: TCGCACGAACTTGGACTACTG  R’: CCAACTGAGGTATATGTCAGCAG |
| cGAS | F’: GTCGGAGTTCAAAGGTGTGGA  R’: GACTCAGCGGATTTCCTCGTG |
| TBK1 | F’: ACTGGTGATCTCTATGCTGTCA  R’: TTCTGGAAGTCCATACGCATTG |
| IRF3 | F’: GCGGGACTTCGTACATCTGG  R’: TTCGGTAGGTTTTCCTGGGAG |
| IFN-β | F’: TGGGTGGAATGAGACTATTGTTG  R’: CTCCCACGTCAATCTTTCCTC |
| IL1-β | F’: TTCAGGCAGGCAGTATCACTC  R’: GAAGGTCCACGGGAAAGACAC |
